# Supplementary material for: A Pilot Feasibility Study Assessing the Combined Effects of Early Behavioral Intervention and Propranolol on Autism Spectrum Disorder (ASD)
Source: MDPI journal article supplement (doi:10.3390/children10101639), 2023-09-30
Supplement: s1 [file s1]

**Supplementary Table S1.** Summary of outcomes for all participants entering the study with last observations carried forward

| Task                                                  | Propranolol-baseline | Propranolol-6wk               | Propranolol-12wk              | Placebo-baseline | Placebo-6wk      | Placebo-12wk     |
|-------------------------------------------------------|----------------------|-------------------------------|-------------------------------|------------------|------------------|------------------|
| GSOM total                                            | 32.0 (±15.3 SD)      | 27.6 (±9.7 SD)                | 41.2 (±14.0 SD)               | 19.0 (±4.1 SD)   | 16.0 (±7.2 SD)   | 18.8 (±9.1 SD)   |
| SRS                                                   | 74.8 (±11.2 SD)      | 79.4 (±19.9 SD)               | 78.2 (±17.0 SD)               | 78.8 (±9.6 SD)   | 76.8 (±10.9 SD)  | 77.3 (±10.6 SD)  |
| PAS                                                   | 76.3 (±20.1 SD)      | 80.0 (±22.9 SD) <sup>1</sup>  | 84.8 (±32.9 SD)               | 57.0 (±14.0 SD)  | 60.5 (±21.0 SD)  | 60.8 (±21.5 SD)  |
| SEQ                                                   | 90.8 (±23.9 SD)      | 102.6 (±25.5 SD) <sup>2</sup> | 101.6 (±30.7 SD) <sup>3</sup> | 107.3 (±21.4 SD) | 101.3 (±13.5 SD) | 100.3 (±21.9 SD) |
| Vineland-communication                                | 78.8 (±20.3 SD)      | 73.2 (±16.3 SD)               | 73.6 (±26.2 SD)               | 67.0 (±16.5 SD)  | 68.3 (±17.1 SD)  | 66.8 (±19.4 SD)  |
| Vineland-daily living                                 | 78.4 (±19.3 SD)      | 72.0 (±8.0 SD)                | 65.2 (±20.4 SD)               | 72.0 (±10.1 SD)  | 72.5 (±9.7 SD)   | 72.3 (±14.2 SD)  |
| Vineland-social                                       | 70.4 (±13.8 SD)      | 67.0 (±5.7 SD)                | 68.8 (±10.2 SD)               | 60.0 (±17.5 SD)  | 60.5 (±15.6 SD)  | 60.3 (±15.8 SD)  |
| AIM-Peer Interaction<br>Subdomain Impact raw score    | 27.6 (±6.4 SD)       | 25.8 (±8.4 SD)                | 22.8 (±8.7 SD) <sup>4</sup>   | 27.8 (±6.0 SD)   | 27.3 (±7.6 SD)   | 26.8 (±5.1 SD)   |
| AIM-Social Reciprocity<br>Subdomain Impact raw score  | 30.4 (±1.1 SD)       | 31.2 (±4.7 SD)                | 30.4 (±3.1 SD)                | 37.0 (±9.4 SD)   | 34.0 (±11.9 SD)  | 34.3 (±10.0 SD)  |
| AIM-Atypical Behavior<br>Subdomain Impact raw score   | 32.8 (±15.0 SD)      | 35.2 (±8.4 SD)                | 37.6 (±15.3 SD) <sup>5</sup>  | 30.0 (6.5 SD)    | 30.8 (±6.7 SD)   | 29.5 (±6.2 SD)   |
| AIM-Communication<br>Subdomain Impact raw score       | 36.2 (±8.0 SD)       | 34.4 (±6.4 SD)                | 35.8 (±11.8 SD)               | 43.5 (±5.4 SD)   | 40.3 (±9.0 SD)   | 41.5 (±5.2 SD)   |
| AIM-Repetitive Behavior<br>Subdomain Impact raw score | 41.2 (±19.1 SD)      | 43.6 (±14.8 SD) <sup>6</sup>  | 43.4 (±19.7 SD)               | 45.5 (8.3 ± SD)  | 40.3 (±5.7 SD)   | 43.3 (±10.6 SD)  |

(Student's paired t-test:

1 = p=0.070 vs baseline, 2 = p=0.051 vs baseline, 3 = p=0.064 vs baseline, 4 = p=0.087 vs baseline, 5 = p=0.080 vs baseline, 6 = p=0.061 vs baseline)
